# Supplementary material for: Core-Clock Genes Regulate Proliferation and Invasion via a Reciprocal Interplay with MACC1 in Colorectal Cancer Cells
Source: MDPI journal article supplement (doi:10.3390/cancers14143458), 2022-07-16
Supplement: s1 [file s1]

**SUPPLEMENTARY MATERIALS**

Raw western blot images:

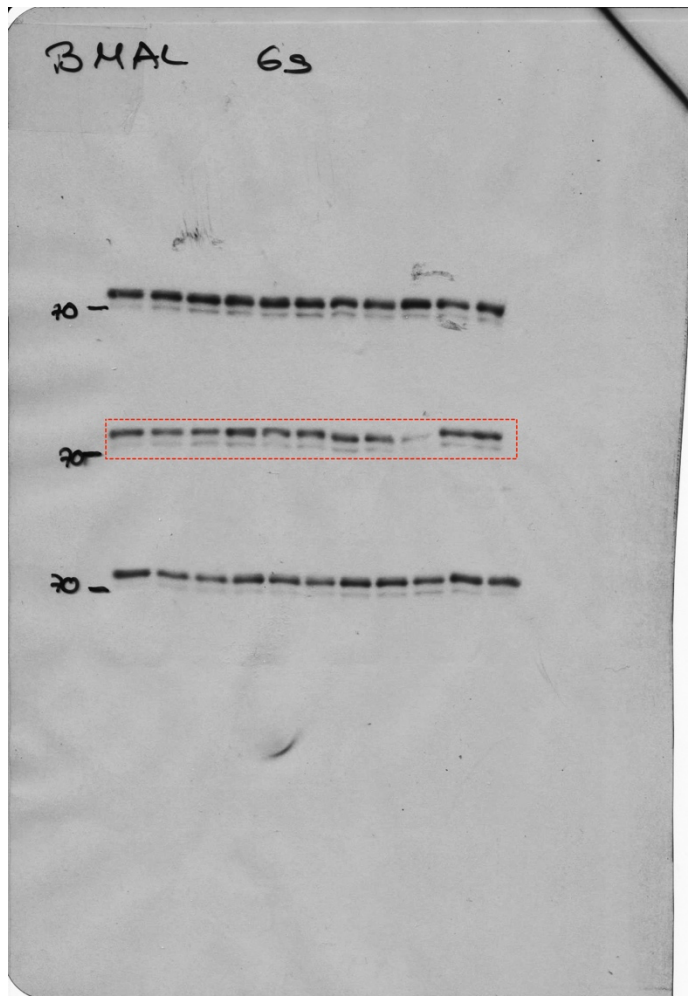

Figure 6A: WT-ARNTL

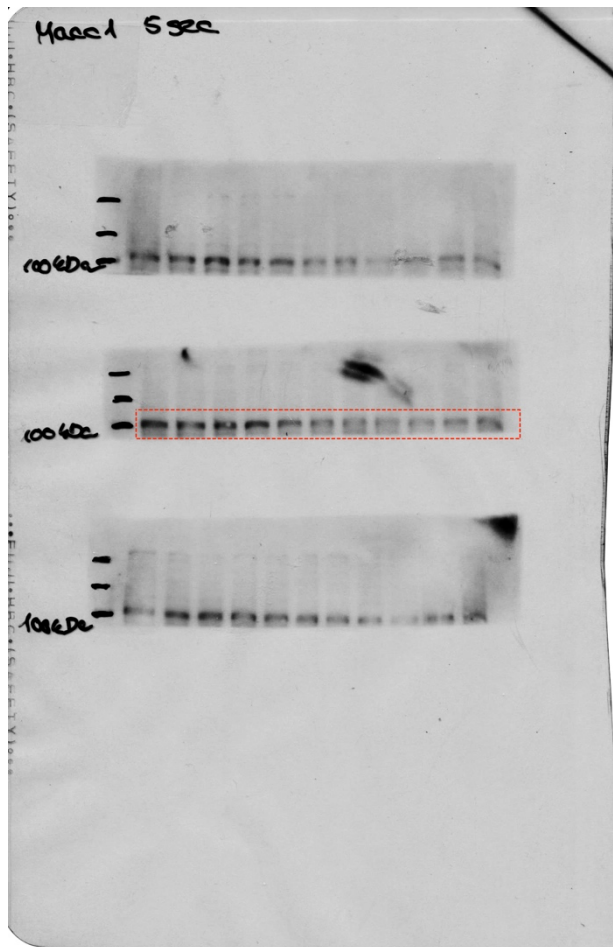

Figure 6A: WT-MACC1

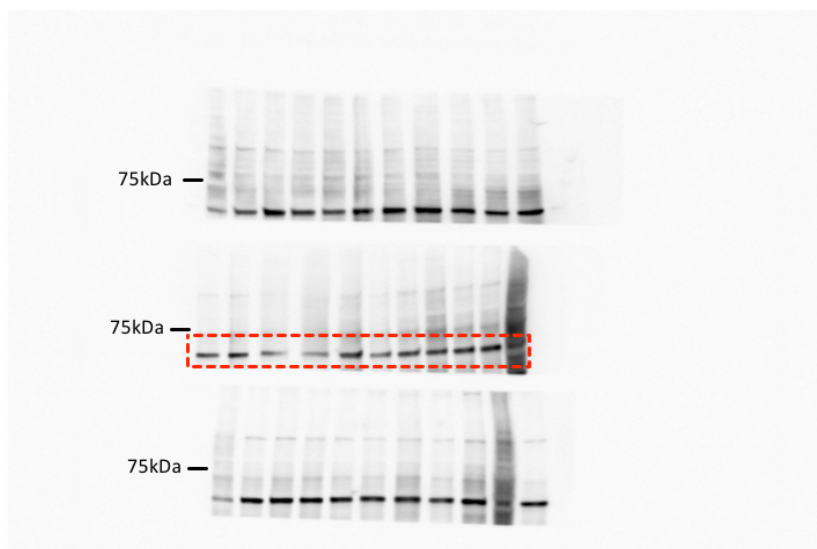

Figure 6A: WT-NR1D1

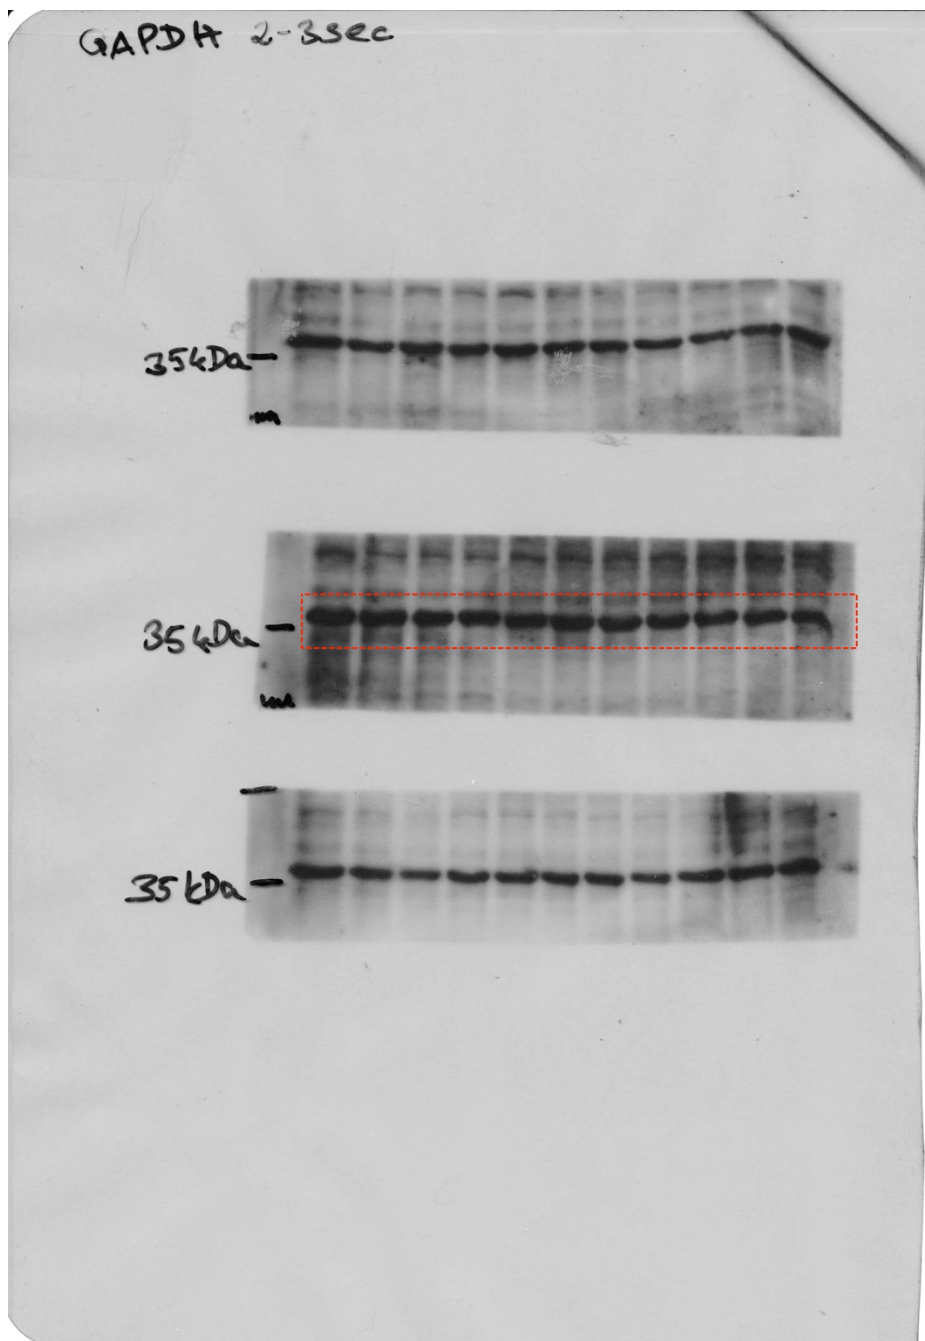

Figure 6A: WT-GAPDH

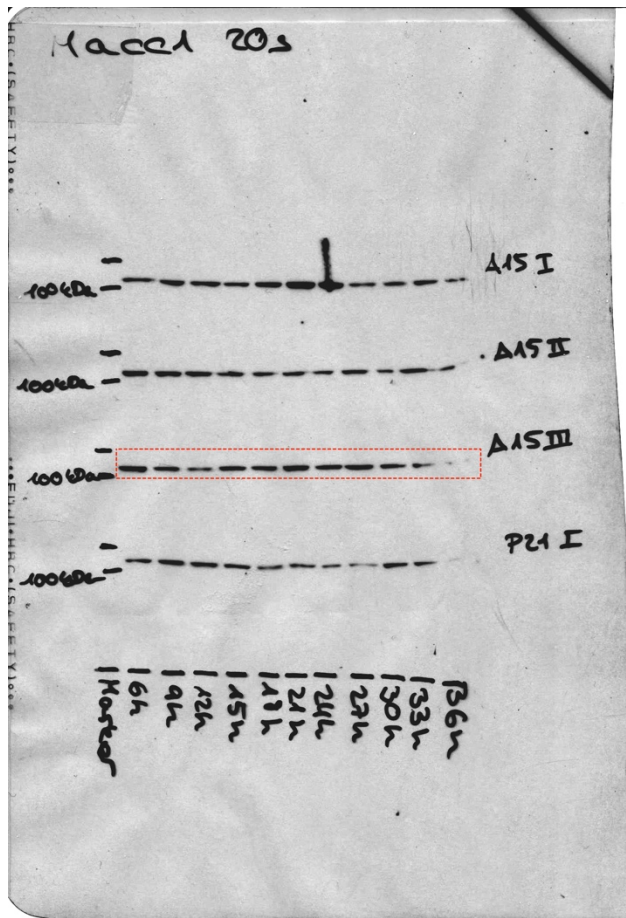

Figure 6B: ARNTL KO-MACC1

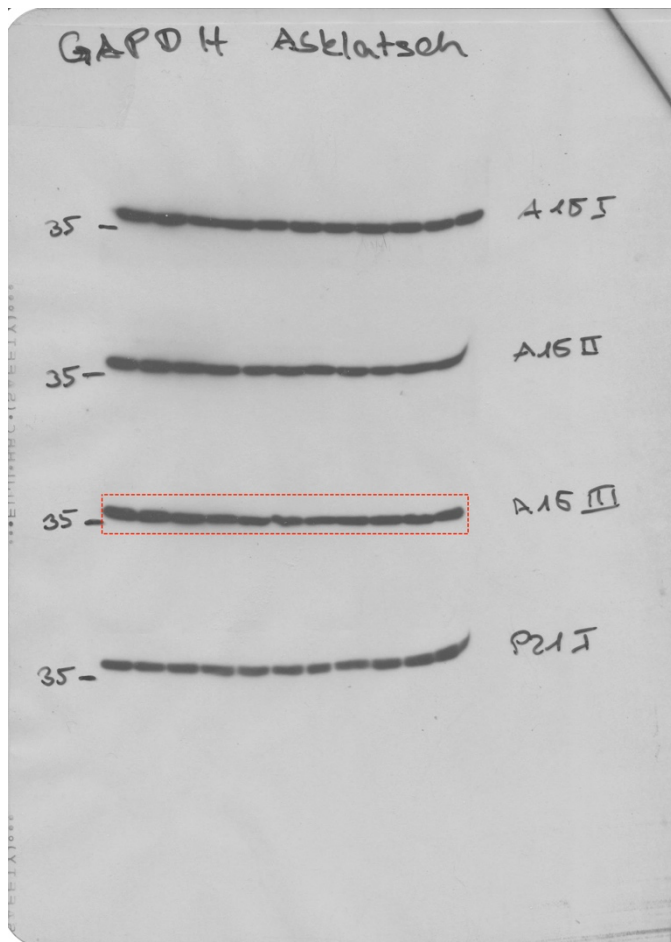

Figure 6B: ARNTL KO-GAPDH

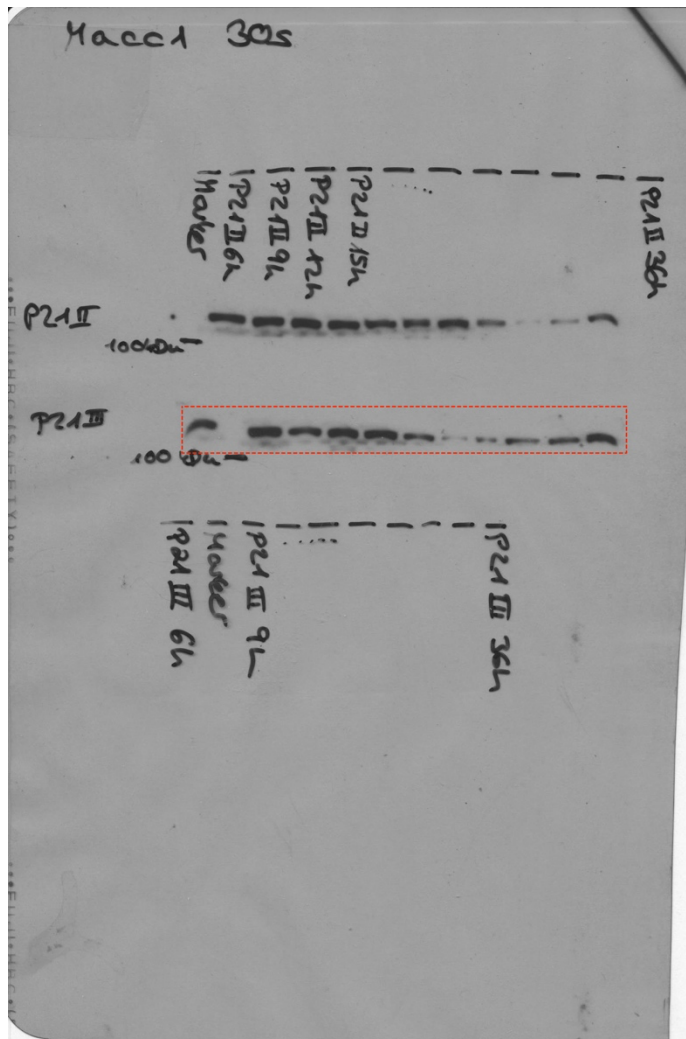

Figure 6B: PER2 KO-MACC1



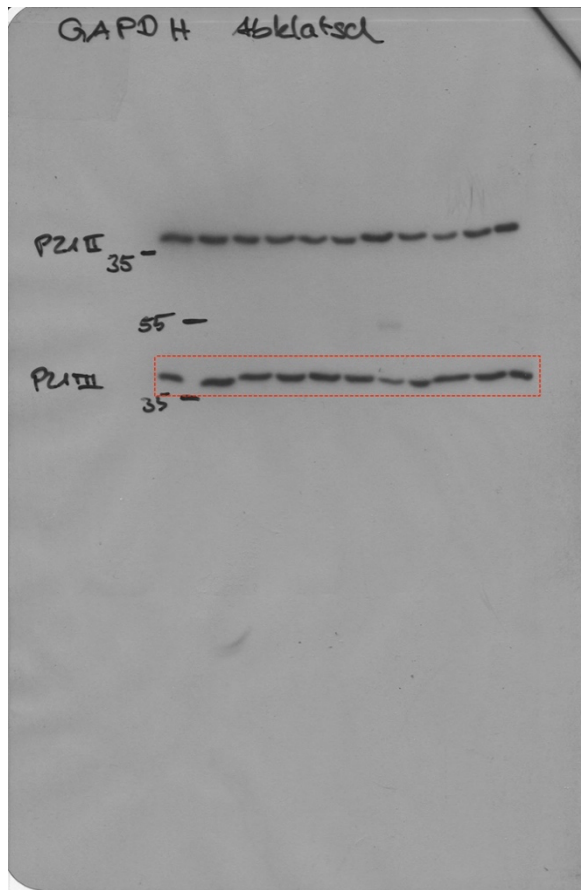

Figure 6B: PER2 KO-GAPDH

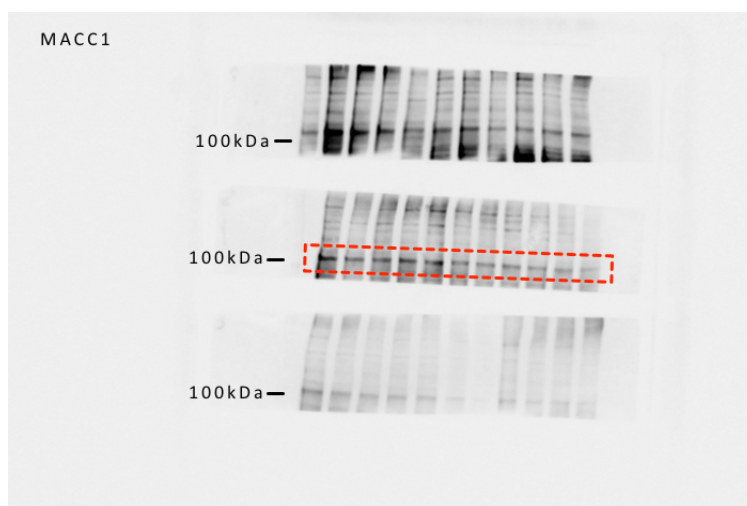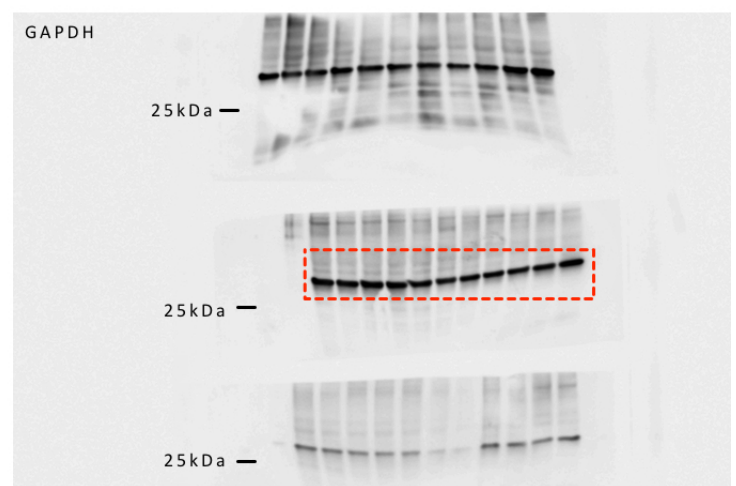

Figure 6B: NR1D1 KO-MACC1 &amp; GAPDH

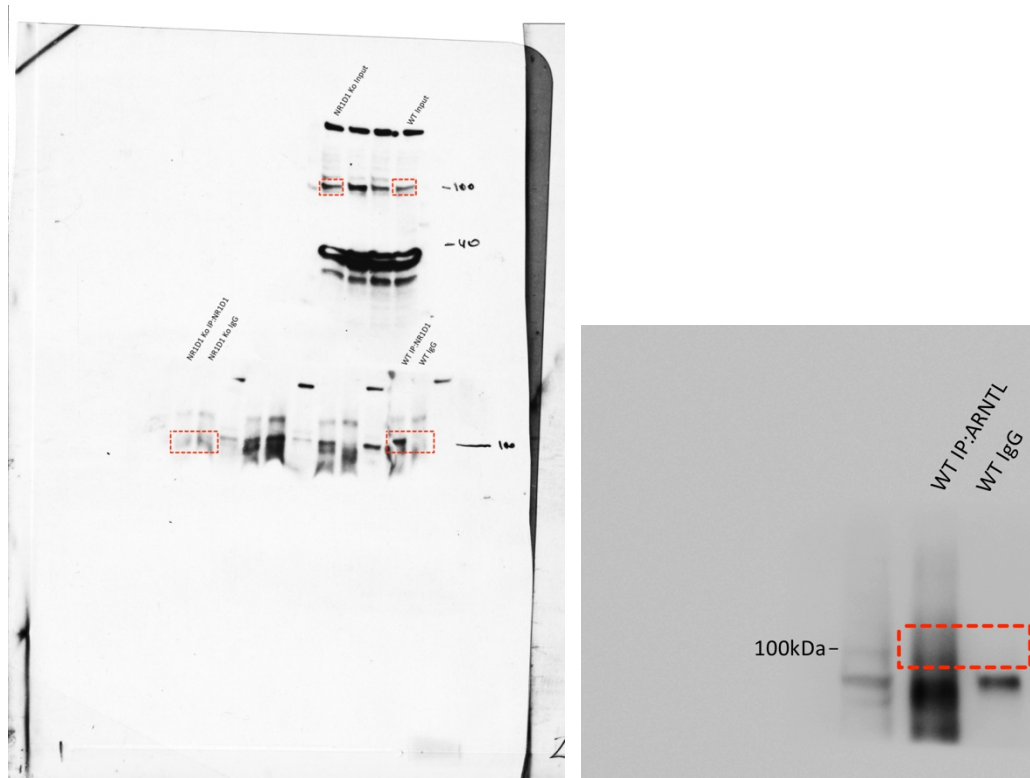

Figure 6C-D: Co-IP: IP with NR1D1 or ARNTL, WB with MACC1 in HCT116 WT and NR1D1 KO



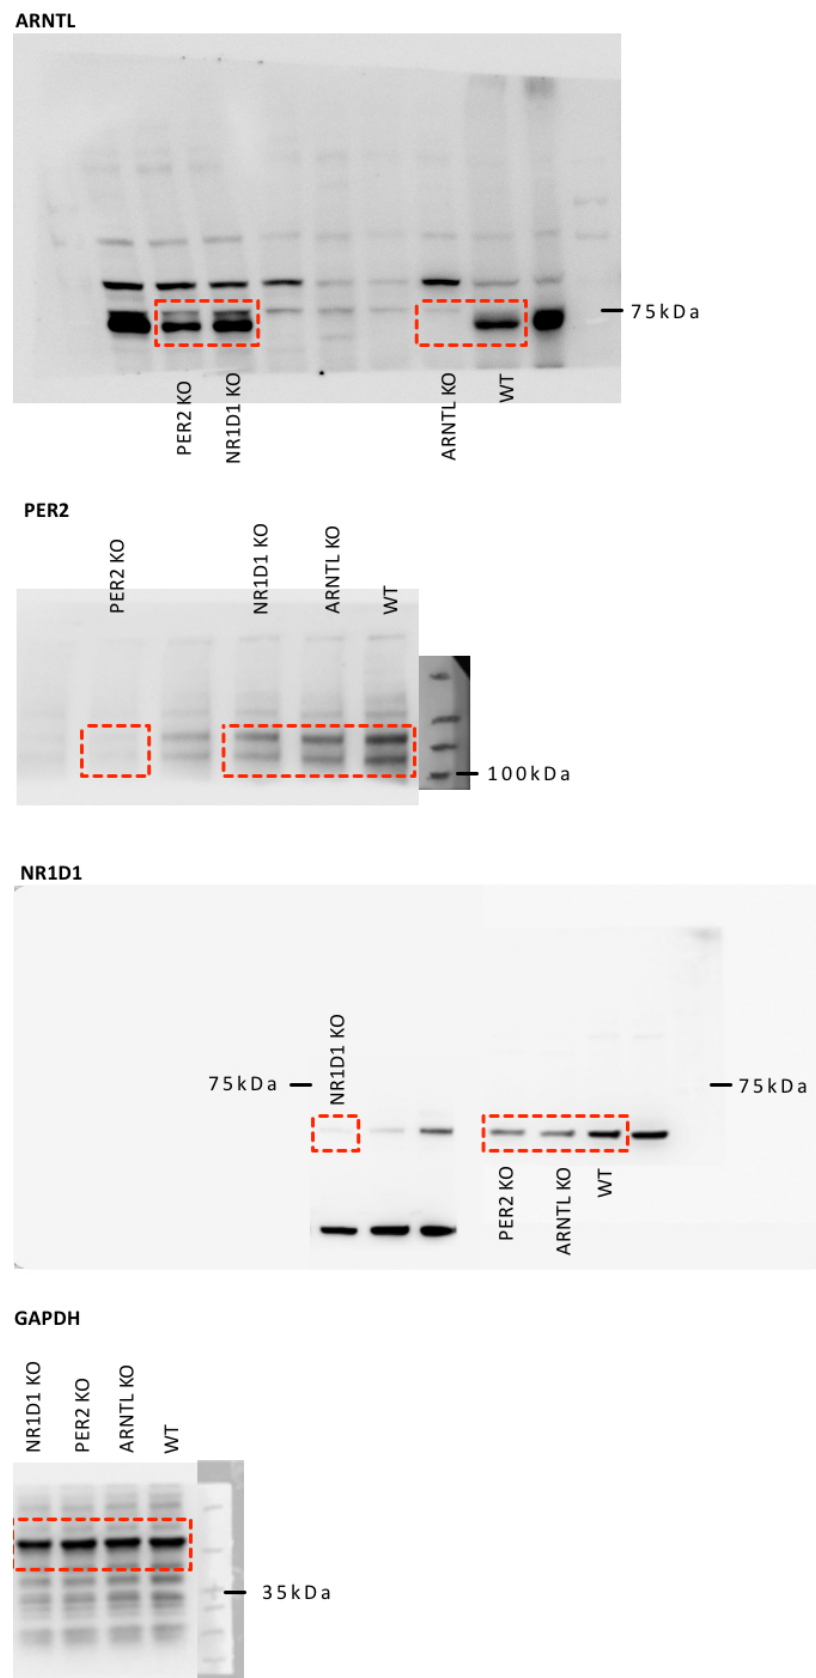

Figure S1-E: WT, ARNTL KO, PER2 KO and NR1D1 KO.
